# Supplementary material
Source: PubMed Central journal article supplement (PMC2973885)
Supplement: 1004380107_pnas.201004380SI.pdf [file 1004380107_pnas.201004380SI.pdf]

# Supporting Information

Lührmann et al. 10.1073/pnas.1004380107

## SI Materials and Methods

**Apoptosis Assays.** CHO cells were transfected with the indicated plasmids. The cells were incubated with staurosporine (0.5  $\mu\text{g}/\text{mL}$ ) for 5 h. The cells were fixed with 3% (wt/vol) paraformaldehyde for 20 min, permeabilized with ice-cold methanol for 30 s, quenched with 50 mM  $\text{NH}_4\text{Cl}$  for 15 min, and labeled with HA-specific antibody (Convance Research Products) and fluorescein-labeled secondary antibody (Molecular Probes) or left unlabeled. Cells were mounted using ProLong Gold with DAPI (Invitrogen) to visualize the nucleus. The nuclear morphology of transfected cells was scored using a Nikon TE-200 inverted microscope.

CHO FcR cells were incubated with anti-*Legionella pneumophila* antibody 30 min before infection with wild-type *L. pneumophila* or with the defect in organelle trafficking (*dotA*) mutant expressing the indicated plasmids at a multiplicity of infection (MOI) of 30 for 1 h (1). The cells were washed with PBS and treated with staurosporine (0.4  $\mu\text{g}/\text{mL}$ ) for 5 h. *L. pneumophila* were detected using an Alexa Fluor 594 secondary antibody (Molecular Probes). Nuclear DNA fragmentation was assayed by TUNEL with the in situ cell death detection kit (Roche). The nuclei were analyzed as described above.

After being isolated using CD11c magnetic beads (2), dendritic cells (DCs) were infected with *L. pneumophila* at an MOI of 25 and assayed for nuclear DNA fragmentation by TUNEL with the in situ cell death detection kit (Roche). Samples then were analyzed by fluorescence microscopy. All data points represent the average number of TUNEL-positive cells  $\pm$  SD obtained from three independent coverslips.

**Coimmunoprecipitation.** HEK 293 cells were transfected with the indicated plasmids. Cells were lysed in lysis buffer [20 mM Hepes (pH 7.5), 200 mM NaCl, 1 mM EDTA, 0.1% (vol/vol) Nonidet P-40, 10% (vol/vol) Glycerol, 1 $\times$  protease inhibitor, 1 mM DTT] for 30 min on ice and centrifuged for 10 min, 16,000  $\times$  g. at 4  $^\circ\text{C}$ . The supernatants were incubated with anti-GFP rabbit antiserum (Invitrogen) for 3 h at 4  $^\circ\text{C}$ . Complexes were precipitated using protein A Sepharose beads (40 min at 4  $^\circ\text{C}$ ). The beads were washed three times with buffer [20 mM Hepes (pH 7.5), 200 mM NaCl, 1 mM EDTA, 0.1% (vol/vol) Nonidet P-40]. Precipitated proteins were analyzed by immunoblotting.

**Immunoblotting.** Proteins were separated by SDS/PAGE and transferred to PVDF membrane (Millipore). The membranes were probed with antibodies specific for GFP (Roche), HA (Convance Research Products), and gC1qR (p32) (Santa Cruz). Proteins were visualized using HRP-conjugated secondary antibodies (Zymed) and a chemiluminescence detection system (Perkin-Elmer).

**Protein Purification.** *Escherichia coli* BL21 (DE3) cells transformed with plasmids producing either GST or GST-ankyrinG (AnkG) were grown to an OD = 0.4. Isopropyl  $\beta$ -D-1-thiogalactopyranoside was added, and samples were incubated for 4 h at 30  $^\circ\text{C}$ . Cells were resuspended in PBS containing protease inhibitor. After disruption by French press, the lysates were clarified by centrifugation at 15,000  $\times$  g for 30 min. Supernatants were loaded onto glutathione-Sepharose columns (GE Healthcare). Bound proteins were eluted with 10 mM glutathione in PBS. Proteins were dialyzed and coupled to Affi-Gel 15 (BioRad) according to the manufacturer's protocol.

CHO cells were resuspended in lysis buffer [0.5% (vol/vol) Triton X-100, 50 mM Tris (pH 7.5), 100 mM NaCl] for 1 h on ice. After centrifugation (20,000  $\times$  g for 20 min at 4  $^\circ\text{C}$  and 100,000  $\times$  g for 45 min at 4  $^\circ\text{C}$ ), the supernatant was incubated with GST or GST-AnkG coupled to Affi-Gel for 3–4 h at 4  $^\circ\text{C}$ . Beads were washed with lysis buffer and TBS [10 mM Tris (pH 7.5), 150 mM NaCl]. Bound proteins were eluted in 100 mM glycine (pH 2.4) and 150 mM NaCl and neutralized with 1 M Tris (pH 8.0). Eluted proteins were precipitated using trichloroacetic acid and separated by SDS/PAGE. The gel was stained with silver, and unique bands from the GST-AnkG column were excised and analyzed by MALDI-TOF (Protana Analytical Services).

**siRNA Knock Down.** The Dharmacon protocol for siRNA transfection of HeLa cells was used. Three days after the cells were transfected with 10 nM p32 siRNA, the cells were washed with PBS and exposed to UV light (600  $\text{J}/\text{m}^2$ ) in a transilluminator box (Stratagene). After fresh medium was added, cells were incubated for 5 h. The cells were fixed, permeabilized, quenched, and mounted as described above. The nuclear morphology of cells was scored as described above.

siRNA knock-down in mouse bone marrow DCs was performed as described previously with some alterations (3). Briefly, 8 d after DC differentiation, 6  $\mu\text{g}$  of siRNA single oligonucleotide (A, B, C, D) or 6  $\mu\text{g}$  of a pool of four siRNA oligonucleotides directed against mouse p32 were introduced into the cells by electroporation. DCs electroporated with no siRNA were used as control (mock treatment). The efficiency of knock-down was confirmed 48 h post electroporation by immunoblotting using a p32-specific antibody from Abcam. DCs then were sorted using CD11c magnetic beads (Miltenyi Biotec) and infected with wild-type *L. pneumophila*, a flagellin-deficient strain of *L. pneumophila* ( $\Delta\text{flaA}$ ),  $\Delta\text{flaA}$  expressing AnkG, or  $\Delta\text{dotA}$  for 1 and 10 h. At each time point, DCs were fixed and stained, and consequently assays to measure uptake and formation of vacuoles containing replicating *L. pneumophila* in DCs were conducted as previously described (2).

1. Kagan JC, Roy CR (2002) Legionella phagosomes intercept vesicular traffic from endoplasmic reticulum exit sites. *Nat Cell Biol* 4:945–954.
2. Nogueira CV, et al. (2009) Rapid pathogen-induced apoptosis: A mechanism used by dendritic cells to limit intracellular replication of Legionella pneumophila. *PLoS Pathog* 5:e1000478.

3. Jantsch J, et al. (2008) Small interfering RNA (siRNA) delivery into murine bone marrow-derived dendritic cells by electroporation. *J Immunol Methods* 337:71–77.

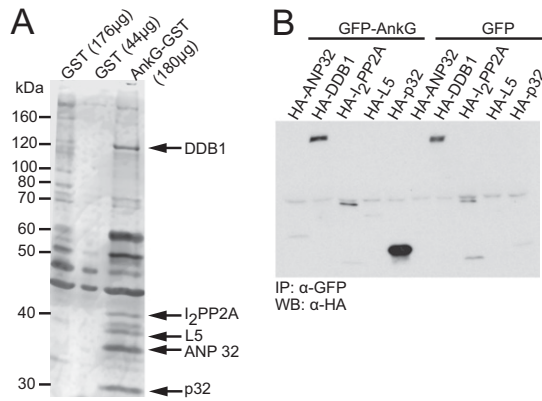

**Fig. 51.** Identification of host-cell proteins that bind to AnkG. (A) Affi-Gel columns with immobilized GST-AnkG or GST alone were incubated with lysates from CHO. Bound proteins were analyzed by SDS/PAGE and silver staining after elution. Arrows indicate the position of five unique bands that were excised and analyzed by MALDI-TOF. Protein identities as predicted by mass spectrometry are indicated next to each arrow. (B) HEK 293 cells were cotransfected with plasmids encoding GFP-AnkG or a control GFP along with the potential AnkG binding partners tagged with the HA epitope. Proteins in the lysates were immunoprecipitated with an anti-GFP antibody (IP) and analyzed by immunoblotting (WB) with an anti-HA antibody.

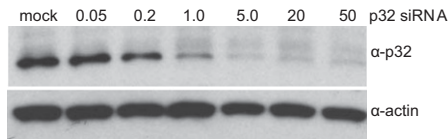

**Fig. 52.** siRNA silencing of p32. HeLa cells were transfected with indicated concentrations of p32 siRNA (nM). The efficiency of p32 silencing was determined 3 d posttransfection by immunoblot analysis using an anti-p32 antibody. The anti-actin immunoblot was used as a control for equal protein loading.

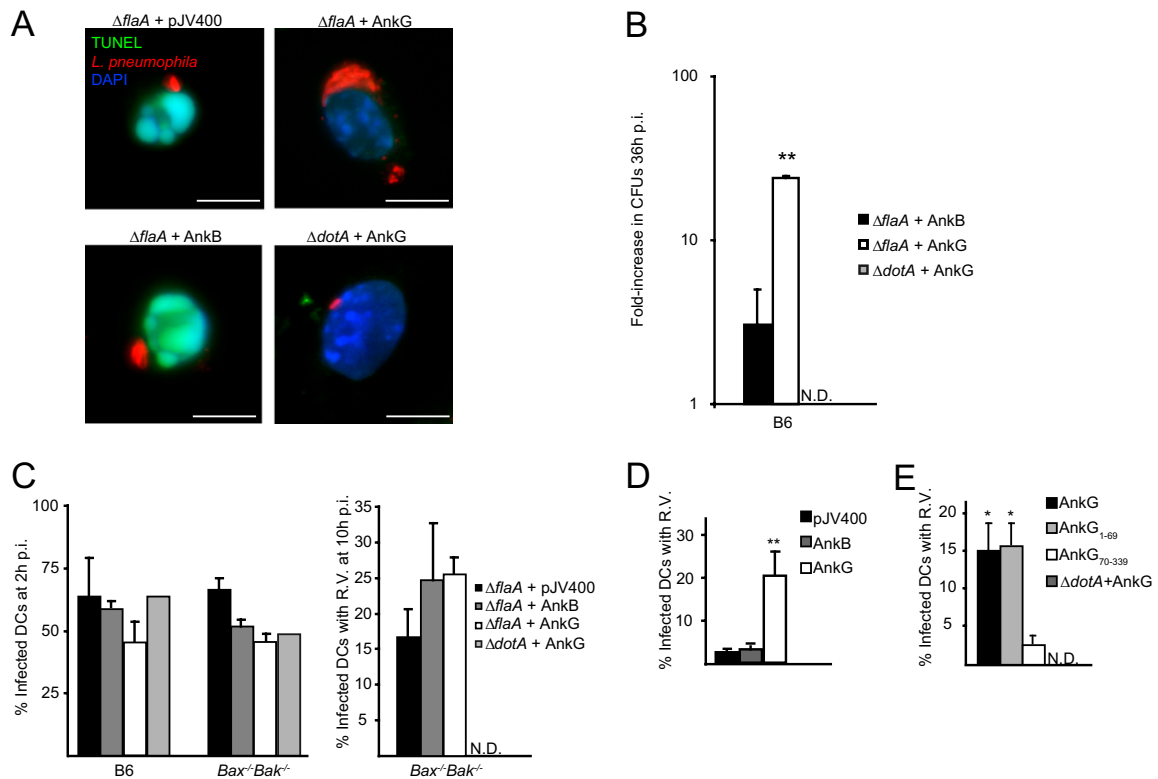

**Fig. 53.** The antiapoptotic effects of AnkG during *L. pneumophila* infection are sufficient to allow bacterial intracellular replication in DCs. (A) Fluorescence micrographs show TUNEL staining (green) of DCs derived from B6 mice infected for 6 h with *L. pneumophila*  $\Delta flaA$  (red) expressing the pJV400 vector ( $\Delta flaA$  + pJV400) (Upper Left), pJV400-AnkG ( $\Delta flaA$  + AnkG) (Upper Right), pJV400-AnkB ( $\Delta flaA$  + AnkB) (Lower Left), or *L. pneumophila*  $\Delta dotA$  expressing AnkG ( $\Delta dotA$  + AnkG) (Lower Right). Note that in the  $\Delta flaA$  + AnkG cell there were no obvious signs of apoptosis despite the presence of a large replicative vacuole containing *L. pneumophila*. Total DNA was stained with DAPI (blue), and bacteria were stained in red. (Scale bar: 10  $\mu$ m.) (B) B6 DCs were infected with *L. pneumophila*  $\Delta flaA$  expressing AnkB ( $\Delta flaA$  + AnkB) (black bars) or AnkG ( $\Delta flaA$  + AnkG) (white bars) or with *L. pneumophila*  $\Delta dotA$  + AnkG (gray bars) for 36 h. The efficiency of intracellular replication was determined by dividing the number of *L. pneumophila* cfus recovered at 36 h postinfection by the number of cfus recovered at 1 h postinfection. Data for each time point are the average of values obtained from three independent wells.  $**P < 0.01$ . N.D., not detectable. (C) Graphical representations of the percentage of B6 and Bcl-2-associated X (*Bax*)<sup>-/-</sup> BCL2-antagonist/killer (*Bak*)<sup>-/-</sup> DCs infected at 2 h (Left) and the percentage of infected *Bax*<sup>-/-</sup>*Bak*<sup>-/-</sup> DCs with vacuoles containing replicating bacteria at 10 h postinfection (Right). Data represent the mean  $\pm$  SD of 300 cells counted per coverslip in triplicate. R.V., vacuoles containing replicating bacteria. There were no vacuoles containing replicating bacteria detected (N.D.) for the  $\Delta dotA$  + AnkG strain, which would have been indicated with a light gray bar. (D and E) Graphical representations of the percentage of infected B6 DCs with (D) *L. pneumophila*  $\Delta flaA$  + pJV400 (black bar),  $\Delta flaA$  + AnkB (gray bar), and  $\Delta flaA$  + AnkG (white bar) and (E) *L. pneumophila*  $\Delta flaA$  expressing AnkG (black bar), AnkG<sub>1-69</sub> (light gray bar) or AnkG<sub>70-339</sub> (white bar). There were no vacuoles containing replicating bacteria detected (N.D.) for the  $\Delta dotA$  + AnkG strain, which would have been indicated with a dark gray bar. Vacuoles containing replicating bacteria at 10 h postinfection were counted. Shown are mean  $\pm$  SD of 300 cells counted per coverslip in triplicate in at least three independent experiments.  $**P < 0.05$ ;  $*P < 0.01$ .

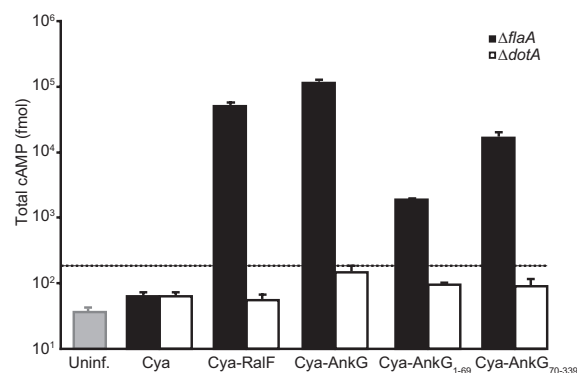

**Fig. 54.** AnkG<sub>1-69</sub> and AnkG<sub>70-339</sub> are translocated by the Dot/Icm secretion apparatus during *L. pneumophila* infection. CHO Fc $\gamma$ RII cells were left uninfected (gray bars) or were infected with either *L. pneumophila*  $\Delta flaA$  (black bars) or  $\Delta dotA$  (white bars) expressing the indicated adenylate cyclase (Cya) fusion proteins. After 1 h of infection, tissue culture cells were lysed, and cAMP was extracted from the sample. Total cAMP (indicated as fmol) production induced by translocation of the hybrid was quantified using an enzyme-immunoassay system. Results represent average values  $\pm$  SD of experiments performed in triplicate.

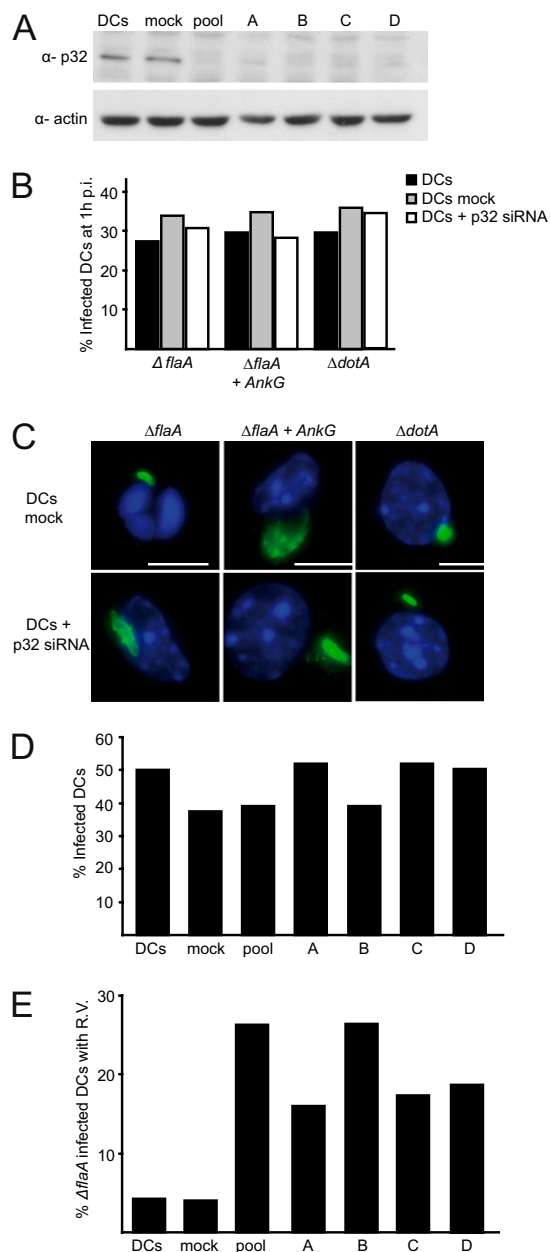

**Fig. S5.** Knock-down of p32 prevents *L. pneumophila*-induced apoptosis and allows bacterial intracellular replication in DCs. (A) DCs derived from B6 mice were electroporated with 6 μg of a pool of siRNA directed against mouse p32. The individual nonoverlapping siRNA oligonucleotides (A, B, C, D) that comprised the pool were also used to silence p32 as indicated. DCs electroporated with no siRNA were used as control (mock). Efficiency of p32 silencing was determined by immunoblot analysis 2 d after electroporation using a p32 antibody. An anti-actin immunoblot was used as a control for equal protein loading. (B) Shown are the percentages of untreated DCs, DCs treated with p32 siRNA, or mock-treated DCs infected with *L. pneumophila* Δ*flaA*, Δ*flaA* + *AnkG*, or Δ*dotA* 1 h postinfection. Results of one experiment representative of three independent experiments are shown. These data indicate the efficiency of bacterial uptake was not affected adversely by the siRNA treatment or by the introduction of *AnkG* into the bacteria. (C) Fluorescence micrographs show DCs either treated with siRNA against p32 or mock treated and then infected for 10 h with *L. pneumophila* Δ*flaA*, Δ*flaA* expressing *AnkG*, or Δ*dotA*. DNA was stained with DAPI (blue), and bacteria were stained with an anti-*Legionella* antibody (green). (Scale bar 10 μm.) (D and E) DCs were electroporated with 6 μg of siRNA single oligonucleotides (A, B, C, D) or with 6 μg of a pool of siRNA directed against mouse p32. DCs electroporated with no siRNA were used as control (mock). Two days after electroporation the DCs were sorted using CD11c magnetic beads and were infected with *L. pneumophila* Δ*flaA*. (D) The percentage of infected DCs at 1 h postinfection is presented for one experiment representative of three independent experiments that yielded similar results. (E) Vacuoles containing replicating bacteria at 10 h postinfection were counted. Data are shown for one experiment representative of three independent experiments yielding similar results. R.V., vacuoles containing replicating bacteria.

**Table S1. Plasmids and primers used in this study**

| Plasmid                           | Primer*           | Reference              |
|-----------------------------------|-------------------|------------------------|
| pGEX-5X-1                         |                   | Amersham               |
| pEGFP-C1                          |                   | Clontech               |
| pJV400                            |                   | This study             |
| pJV400-ankB                       | 10, 371           | This study             |
| pJV400-ankG                       | 26, 373           | This study             |
| pJV400-ankG(1-69)                 | 373, 389          | This study             |
| pJV400-ankG(70-339)               | 390, 26           | This study             |
| pJV400-ankF                       | 22, 372           | This study             |
| pJV450-ankG(1-69)                 | 25, 389           | This study             |
| pJV450-ankG(70-339)               | 402, 26           | This study             |
| pGEX-5X-2-ankG                    | 96, 97            | This study             |
| pEGFP-C2-ankA                     | 30, 71            | This study             |
| pEGFP-C2-ankB                     | 72, 73            | This study             |
| pEGFP-C2-ankF                     | 40, 74            | This study             |
| pEGFP-C-ankG                      | 34, 75            | This study             |
| pEGFP-C1- p32                     | 185, 186          | This study             |
| pCMV-HA-ankG                      | 80, 307           | This study             |
| pCMV-HA-ankG( $\Delta$ 92-157)    | 80, 307, 324, 325 | This study             |
| pCMV-HA-ankG(1-69)                | 329, 338          | This study             |
| pCMV-HA-ankG(70-339)              | 332, 340          | This study             |
| pCMV-HA- <i>anp32</i>             | 301, 302          | This study             |
| pCMV-HA- <i>ddb1</i>              | 312, 313          | This study             |
| pCMV-HA- <i>i<sub>2</sub>pp2a</i> | 303, 304          | This study             |
| pCMV-HA- <i>I5</i>                | 305, 306          | This study             |
| pCMV-HA- p32                      |                   | This study             |
| pCYA-AnkG                         |                   | Pan et al., 2008 (1)   |
| pCYA-RalF                         |                   | Nagai et al., 2005 (2) |
| pCYA-AnkG (1-69)                  |                   | This study             |
| pCYA-AnkG (70-339)                |                   | This study             |

\*Primer numbers are as in [Table S2](#).

1. Pan X, Lührmann A, Satoh A, Laskowski-Arce MA, Roy CR (2008) Ankyrin repeat proteins comprise a diverse family of bacterial type IV effectors. *Science* 320:1651-1654.
2. Nagai H, et al. (2005) A C-terminal translocation signal required for Dot/Icm-dependent delivery of the *Legionella* RalF protein to host cells. *Proc Natl Acad Sci USA* 102:826-831.

Table S2. Primers used in this study

| Primer | Sequence                                    | Site          |
|--------|---------------------------------------------|---------------|
| 10     | AAGGCGCGCCttacatgtgcttaccggg                | <i>Ascl</i>   |
| 22     | aaggcgcgccctaccgctggaagccgc                 | <i>Ascl</i>   |
| 25     | AAGGCGCGCCAAGTAGACGTGAGACTCCC               | <i>Ascl</i>   |
| 26     | AAGGCGCGCCtaccgaggactagacag                 | <i>Ascl</i>   |
| 30     | AAGGATCCttaaacagctccggggcct                 | <i>BamHI</i>  |
| 34     | AAGGATCCtaccgaggactagacaga                  | <i>BamHI</i>  |
| 40     | AAGGATCCtaccgctggaagccgc                    | <i>BamHI</i>  |
| 71     | CCGAATTCttgcagttggcagcccgt                  | <i>EcoRI</i>  |
| 72     | CCCCTGCAGatgtttaaccaattggaatagt             | <i>PstI</i>   |
| 73     | CCGGTACCttacatgtgcttaccggg                  | <i>KpnI</i>   |
| 74     | CCCCTGCAGTatgagacagcgtgaaattaat             | <i>PstI</i>   |
| 75     | CCGGTACCGCatgagtagacgtgagactc               | <i>KpnI</i>   |
| 80     | CCGGTACCtaccgaggactagacaga                  | <i>KpnI</i>   |
| 96     | CCGGATCCCcatgagtagacgtgagactc               | <i>BamHI</i>  |
| 97     | CCCCCGGGtaccgaggactagacaga                  | <i>SmaI</i>   |
| 185    | CCGGATCCCTACTGGCTCTTGACAAAAT                | <i>BamHI</i>  |
| 186    | CCGGATCCCTGCACACCGACGGAGAC                  | <i>BamHI</i>  |
| 301    | ccggtaccatggagatgaagaagaagattaa             | <i>KpnI</i>   |
| 302    | ccggtaccctagtcattcttctctc                   | <i>KpnI</i>   |
| 303    | ccggtaccatgtcggcggcggcgg                    | <i>KpnI</i>   |
| 304    | ccggtaccctagtcattcttctctc                   | <i>KpnI</i>   |
| 305    | ccggtaccatggggtttgtaagttgtaa                | <i>KpnI</i>   |
| 306    | ccggtaccctagctctcagcagccg                   | <i>KpnI</i>   |
| 307    | ccggtaccATGAGTAGACGTGAGACTCC                | <i>KpnI</i>   |
| 312    | ccggtaccatgtctacaactacgtgta                 | <i>KpnI</i>   |
| 313    | ccggtaccctaatggatccgagttagct                | <i>KpnI</i>   |
| 324    | AGGTTCTGTCCTAAATCCGTCTTTGGCGGTAC            |               |
| 325    | AAAGACGGATTAGGACAGAACCTTTTAGAACT            |               |
| 329    | ccaagatctctATGAGTAGACGTGAGACTCC             | <i>BglII</i>  |
| 332    | ccaagatctctatgCTTCGCGGGATTCTTTCA            | <i>BglII</i>  |
| 338    | ccggtaccctcaGTAGTTTTTATTATGTCTAAGCT         | <i>KpnI</i>   |
| 340    | ccggtaccTACCGAGGACTAGACAGA                  | <i>KpnI</i>   |
| 341    | ccgaattctatgtcgggaggtggtga                  | <i>EcoRI</i>  |
| 342    | cctctagattatgtacgagagcgagatct               | <i>XbaI</i>   |
| 343    | GCATTCCTCGAGGGCGGATTGAATGTAGGT              | <i>XhoI</i>   |
| 344    | GCATTCGCGGCCGCGAGAGAAGCCAGGATAGGAC          | <i>NotI</i>   |
| 345    | GCATTCGCGGCCGCCCTGACCCTGCCATCTCGTT          | <i>NotI</i>   |
| 346    | GCATTC <b>AAGCTT</b> ACCAGCGGTTGAAGCGTTCTCT | <i>HindII</i> |
| 348    | CCAGCGGTTGAAGCGTTCTCT                       |               |
| 351    | TGATCTAGAGTCGCGGCCGA                        |               |
| 353    | GGAAGAGAACAGGACTGAGGC                       |               |
| 354    | GTTTTTGTTCGGGCCCAAGCTT                      |               |
| 371    | ccggccggccATGTTTAACCAATTGGAAATAGT           | <i>FseI</i>   |
| 372    | ccggccggccatgagacagcgtgaaattaatg            | <i>FseI</i>   |
| 373    | ccggccggccATGAGTAGACGTGAGACTCC              | <i>FseI</i>   |
| 389    | ccggcgccctcagtagtttttattatgtctaagc          | <i>Ascl</i>   |
| 390    | ccggccggccatgcttcggggattcttttca             | <i>FseI</i>   |
| 402    | ccggcgcccaatgcttcgggggattcttttca            | <i>Ascl</i>   |

Boldface denotes the location of the restriction site indicated in the next column.
